1 **Mice optimize switching decisions through cost-benefit evaluation**

2

3 Nathan A. Schneider, John Lisman, Hyun Jae Pi \*

4

5 **Affiliations:**

6 Volen Center for Complex Systems,

7 Department of Biology,

8 Brandeis University, Waltham, Massachusetts 02453, USA.

9

10 \*Correspondence: Hyun Jae Pi ([hyunpi@brandeis.edu](mailto:hyunpi@brandeis.edu))

11

12 **Keywords:** decision-making, neuroeconomics, cost-benefit analysis, valuation,

13 optimization, mouse behavior, switching decision

14

15 **Acknowledgements**

16 This work is supported by NARSAD Young Investigator Grant and NIH R01MH110391.

17 The authors have no conflicting interests. We thank the Lisman laboratory for assistance,

18 Drs. Don Katz, Sachin Ranade, and Yongsoo Kim for comments on the manuscript, and

19 Drs. Shantanu Jadhav, Michael Halassa, and Michael Hasselmo for suggestions and

20 ideas for experiments.

21 **Abstract**

22 Cost-benefit analysis is a key determinant of decision-making, yet little is known about  
23 the underlying neural circuit mechanisms—perhaps because investigating this abstract  
24 concept using laboratory animals is challenging without quantitative behavioral readouts  
25 and theoretical frameworks. Here, we developed a novel behavioral paradigm to measure  
26 optimal cost-benefit switching decisions in mice. On each trial of the task, a mouse faces  
27 two options to collect reward: one lever provides a small volume of reward that requires  
28 a fixed number of presses (fixed ratio, FR); the other lever confers a large volume, but  
29 the required number of presses increases after each collection (progressive ratio, PR).  
30 The mouse initially prefers the PR with larger reward, but as the session progresses its  
31 preference changes to the FR because of increasing cost of effort (e.g. lever presses) on  
32 the PR. This preference switch was quantified by the indifference point at which the values  
33 of both choices became equivalent. We aimed to quantify a parametric shift in switching  
34 decisions by systematically varying effort cost and reward benefit in a two-dimensional  
35 parameter space. This parametric manipulation successfully influenced the switching  
36 decisions, therefore shifting the indifference points accordingly with the relative value of  
37 the larger reward. Our data-driven estimation of the indifference points was further  
38 validated by a theoretical framework based on the optimization principle. Taken together,  
39 our behavioral paradigm with a theoretical framework provides a quantitative platform to  
40 investigate the function and dysfunction of neural circuits underlying cost-benefit  
41 assessment.

## 42 **Introduction**

43 When confronted with multiple options in an uncertain environment, successful animal  
44 behavior maximizes the benefits and minimizes the costs associated with, for instance,  
45 acquiring food and mates. Across species, the correct assessment of cost and benefit is  
46 a key determinant for survival and long-term well-being (Herrnstein, 1961; Stephens &  
47 Krebs, 1955). This assessment is continually influenced by the animal's fluctuating  
48 intrinsic state and a constantly changing external environment; consequently, the best  
49 decision in one context is not always the best in another context. For instance, pursuing  
50 a low calorie diet may be a healthy choice for people in an advanced economy, but it is  
51 not a wise action for those who are uncertain about when they will have their next meal.  
52 Therefore, it is important to understand how such context-dependent factors adaptively  
53 interact with the process of cost-benefit analysis.

54         How is this decision process handled in the brain? One decision model suggests  
55 that the brain integrates the costs and benefits of a decision into a common neuronal  
56 currency, thus generating values for each choice that are comparable despite differences  
57 in the specific costs and benefits (Levy & Glimcher, 2012; Montague & Berns, 2002).  
58 However, this stand-alone integrator system cannot solve problems adaptably. Additional  
59 systems should exist in the brain that isolate the contributions of each decision variable  
60 (e.g. costs and benefits), update their values separately as intrinsic state and external  
61 stimuli fluctuate (Kolling et al., 2012; Sugrue et al., 2004; Walton et al., 2006), and feed  
62 this information back to the integrator in order to reach the best decision. In this way, the  
63 brain could adapt to changing environments and internal states and guide decisions that  
64 maximize the net utility.

65           Unfortunately, investigating abstract concepts such as cost in non-verbal  
66 laboratory animals is challenging especially without quantitative behavioral readouts and  
67 theoretical frameworks. In addition, while reward processing in the brain has been a major  
68 focus in neuroscience research (Berridge et al., 2009; Schultz et al., 1997; Sutton, 1998),  
69 little is known about the neural circuit mechanisms underlying cost processing aside from  
70 identification of a few brain regions involved (Kolling et al., 2012; Mar et al., 2011;  
71 Rudebeck et al., 2006; Salamone et al., 1991)

72           Our long-term goal is to tackle this challenge by dissecting specific neural circuit  
73 mechanisms involved in neuroeconomic decision making. As a first step, here we  
74 established a quantitative behavioral paradigm that allows us to identify optimal cost-  
75 benefit switching behavior for mice in order to systematically and quantitatively investigate  
76 the cost-benefit interaction on the valuation process. Inspired by several past experiments  
77 on decision-making, effort, and motivated behavior (Atalayer & Rowland, 2009; Bailey et  
78 al., 2015; Hursh et al., 1988; Kepecs et al., 2008; Kolling et al., 2012; Padoa-Schioppa,  
79 2009; Padoa-Schioppa & Assad, 2006; Rudebeck et al., 2006; Salamone et al., 2018;  
80 Salamone et al., 1991; Sweis et al., 2018), our behavioral task combines lever pressing  
81 on a progressive ratio (PR) and fixed ratio (FR) with different amounts of water reward  
82 associated to each (Hodos, 1961). Using this behavioral paradigm, we tested the  
83 hypothesis that mice optimize switching decisions based on cost-benefit assessment. By  
84 independently modulating behavioral parameters associated with benefits and costs, we  
85 were able to quantify a preference shift in mice. This finding is further validated with a  
86 theoretical framework of optimization called the marginal value theorem (MVT; Charnov,

87 1976). Finally, this quantification of the preference shift is influenced by different internal  
88 states of motivation.

## 89 **Results**

### 90 **A novel economic choice behavior for mice**

91 In order to quantitatively evaluate the factors that influence economic decision-  
92 making, we developed a novel behavioral paradigm and tested our hypothesis that mice  
93 optimize switching decisions by assessing the cost and benefit of the given choices.

94 Water-restricted mice were required to press a lever a certain number of times to  
95 collect water reward (Fig. 1a). Mice could freely choose either the fixed ratio (FR) side or  
96 the progressive ratio (PR) side. The FR side provided a small volume of water reward  
97 when mice completed a fixed number of lever presses (Supplementary Video 1);  
98 conversely the PR side provided a large volume of water but the required number of lever  
99 presses increased progressively (e.g. 2, 3, 4 ...) every time mice revisited the side  
100 (Supplementary Video 2). At the beginning of the session, mice preferred the PR side  
101 because they received a large reward with little effort compared to the FR (Fig. 1b). As  
102 the session progressed and the PR requirement became higher, however, the cost of  
103 pressing on the PR overwhelmed the benefit of the large reward. As a result, mice  
104 switched their preference to the FR with small reward, supporting the hypothesis that  
105 mice correctly evaluate the values of given choices.

106 At this switching point, termed an indifference point, the subjective values of either  
107 side became theoretically equivalent. Although the idea of utilizing an indifference point  
108 has been used in several past experiments on effort and motivated behavior (Bailey et  
109 al., 2016; Hodos, 1961; Salamone et al., 2018), we further improved their behavioral  
110 design by exploiting indifference points in a two-dimensional parameter space of large

111 reward size and FR requirement (Fig. 1c). This improvement provides more quantitative  
112 and sensitive measures. For instance, by fixing one parameter (e.g. reward amount) and  
113 changing the other (e.g. lever press requirement), the contribution of cost and benefit to  
114 decision-making can be evaluated semi-independently. Taken together, we established  
115 a quantitative behavioral paradigm and mice were able to make switching decisions by  
116 accurately evaluating the cost-benefit relationship of the given choices.

117

### 118 **Mice adjust switching decisions proportionate to the values of session parameters**

119         Next, we wondered how the changes in relative reward size and the number of  
120 lever presses modulated the switching decisions of mice. In a two-dimensional parameter  
121 space, four combinations of parameters were chosen. The ratio of large reward to small  
122 reward and the fixed number of presses are used to denote the combination of  
123 parameters. For instance, 2xFR12 means the volume of large reward, 6  $\mu$ L, is twice as  
124 much as that of the small reward, 3  $\mu$ L, and the FR requirement is 12 presses. The four  
125 combinations of parameters can be denoted as 2xFR6, 2xFR12, 5xFR6, and 5xFR12  
126 (Fig. 1c). These specific values and combinations were selected based on our initial pilot  
127 experiments because these parameters worked reliably across all mice tested.

128         We hypothesized that mice adjust their switching decisions in response to changes  
129 in the relative values of given choices. If this is the case, the change in session  
130 parameters should influence decisions, therefore shifting the behavioral readouts  
131 accordingly. To test our hypothesis, we ran 10 mice on our optimal switching task with  
132 the parameters 2xFR6, 2xFR12, 5xFR6, and 5xFR12. We evaluated an equal number of

133 male and female mice and did not see significant differences (Supplementary Fig. 1),  
134 therefore we combined the data for further analysis. Four sessions from each parameter  
135 were collected (160 sessions total: 4 sessions x 4 parameter pairs x 10 mice). The PR  
136 and FR sides and the parameter pairs were selected pseudo-randomly at the start of each  
137 session. Consistent with our initial observation, in all parameter conditions mice initially  
138 preferred the PR with large reward and switched their preference to the FR with small  
139 reward as the PR increased (Fig. 1b).

140 The adjustment of switching decisions can be visible even from the plot of  
141 decisions over time (Fig. 1b). The relative value of the PR with large reward is lowest at  
142 2xFR6 because the reward is low and effort cost for the FR is also low. Alternatively, the  
143 PR value is highest at 5xFR12 because the reward is high and the alternative choice  
144 requires more effort. 2xFR12 and 5xFR6 are somewhere in between the two. Reflecting  
145 these relative values, the number of PR choices increased and spread more as the value  
146 increased. These measures were quantified in percentage and deviation of the PR  
147 choices (Fig. 2a-b, Supplementary Fig. 2). The percentages of choosing the PR with large  
148 reward were  $6.5 \pm 1.4\%$ ,  $14 \pm 3\%$ ,  $7.8 \pm 1.5\%$ , and  $19 \pm 4\%$  at 2xFR6, 2xFR12, 5xFR6,  
149 and 5xFR12, respectively. The percentage of the FR choices were 86%, 69%, 84%, and  
150 63%, respectively (Fig. 2a).

151 The percentage of incomplete trials showed a similar trend as the percentage of  
152 large reward choices. A trial is considered incomplete if a mouse stopped pressing the  
153 lever in the middle of a trial for more than ten seconds or if the mouse pressed the  
154 opposite lever after initiating a trial. As the relative values of session parameters got  
155 higher, mice tried and failed more (Fig. 2c) and the failure was more frequent on the PR



156 side (Supplementary Fig. 3-4). The incomplete trial percentages were  $8 \pm 3\%$ ,  $17 \pm 7\%$ ,  
157  $8 \pm 4\%$ , and  $18 \pm 8\%$  for 2xFR6, 2xFR12, 5xFR6, and 5xFR12 respectively. Interestingly,  
158 changing the cost parameter (e.g. number of FR presses) contributed more to the  
159 incomplete trials. The parameters 2xFR6 and 5xFR6 have a difference of only 0.7%, yet  
160 between 2xFR6 and 2xFR12 there is a difference of 9% ( $p < 0.01$ , Wilcoxon Rank-sum  
161 test with Bonferroni correction). The cost change also exerted a stronger effect on the  
162 task performance as indicated in the total number of trials and water collected  
163 (Supplementary Table 1). Consistent with our hypothesis, these results suggest that mice  
164 can differentiate the relative values of the session parameters and adjust their switching  
165 decisions accordingly.

166

### 167 **Estimation of switching decisions by indifference points**

168 When is the right moment for mice to switch their preference from the PR to the  
169 FR to maximize the gain? What is an optimal strategy to maximize gains? In our  
170 behavioral design, these questions can be explored by examining indifference points  
171 where the values of each side become equal. Initially, the PR with large reward is more  
172 valuable than the FR with small reward. As the PR increases, however, the value on the  
173 PR side starts to decrease while the FR side remains fixed. At some point, the combined  
174 value of the PR becomes equivalent to that of the FR:

$$175 \quad V_{PR} = V_{FR}$$

176 An indifference point provides a quantitative and behavioral readout of how mice evaluate  
177 cost and gain. In our behavioral paradigm, the number of lever presses at the indifference

178 point (PR requirement) can also be interpreted as mice's willingness to work to collect  
179 large reward.

180 We estimated the PR requirement at indifference points using three different  
181 approaches: 1) fitting data with a sigmoid function; 2) utilizing median values of completed  
182 PR and FR trials; and 3) developing a measure based on an optimization theory called  
183 the marginal value theorem (Charnov, 1976; Stephens & Krebs, 1955).

184 The first approach for the estimation of the PR requirement at indifference points  
185 was fitting the data with a function that represented the distribution of the choices.  
186 Because our data was binary (e.g. two choices), session data were fit with a sigmoid  
187 function (Boltzmann function). Sigmoid fitting curves captured the profiles of mouse  
188 decisions, showing the transition from the PR to the FR (Fig. 3a-b). The trial number was  
189 first estimated where the sigmoid curve crossed the midline. Then the number of lever  
190 presses required for the PR at that trial was extracted from the data, which provides the  
191 PR requirement at the indifference point of the session data. Figure 3a also shows where  
192 the PR requirement lies on the cumulative distribution of the PR. The results showed that  
193 both at a single mouse level and at the animal average, the estimated PR requirement at  
194 indifference points were lowest at 2xFR6, highest at 5xFR12 and those of 2xFR12 and  
195 5xFR6 lied in between ( $20 \pm 4$  for 2xFR6,  $28 \pm 4$  for 2xFR12,  $29 \pm 4$  for 5xFR6, and  $45 \pm$   
196  $7$  for 5xFR12; Fig. 3c). This shifting pattern of the PR requirement proportional to the  
197 relative values of session parameters suggests that mice perform the task as a rational  
198 agent, which is a basic premise of economic decision-making theory (Levy & Glimcher,  
199 2012).

200           Although binary data is conventionally fit with a sigmoid function, this approach did  
201 not capture the spread of the PR choices. Even after passing an indifference point, mice  
202 occasionally pursued the PR side with large reward despite the high number of required  
203 lever presses (Supplementary Fig. 3). When the relative value of the PR was higher, mice  
204 attempted to collect large reward more often (Supplementary Fig. 4). In order to capture  
205 the spread in estimation of indifference points, we utilized median values of the choices  
206 (Fig. 4a). In this approach, the median trial numbers of the PR and FR were first calculated  
207 and these two medians were connected with a line. An indifference trial number was  
208 defined at the intersections where this line connecting medians crosses the midline. The  
209 PR requirement at the indifference point was then calculated by identifying the number of  
210 presses required on the PR side at this intersection.

211           The PR requirement estimated using median values showed the same trend as  
212 those estimated by the sigmoid function. 2xFR6 had the lowest value of the PR  
213 requirement, 5xFR12 had the highest, and 2xFR12 and 5xFR6 had values in between  
214 ( $30 \pm 3$  for 2xFR6,  $38 \pm 4$  for 2xFR12,  $33 \pm 4$  for 5xFR6, and  $44 \pm 5$  for 5xFR12). Although  
215 the trend was similar, the estimated PR requirements from two different approaches  
216 conferred slightly different values. The standard deviations of PR requirements estimated  
217 by medians were smaller, but the relationship between the PR water volumes was not  
218 significant. In summary, the two different estimations of the PR requirement at  
219 indifference points provide a similar trend in the relative values of session parameters:  
220 the higher the value of the PR, the greater the PR requirement at the indifference point.

221

222 **Estimation of indifference based on a normative model**

223           Switching decisions in our behavioral task can be viewed as an optimization  
224 problem. Our question can be rephrased as such: how do mice optimize their switching  
225 decisions to maximize the reward gained and minimize the effort? We addressed this  
226 question with the marginal value theorem (MVT), a normative model developed to explain  
227 optimal foraging behavior (Charnov, 1976; Stephens & Krebs, 1955). MVT addresses an  
228 optimal strategy of leaving an area with less food to find a better food area, thus  
229 maximizing the energy gained and minimizing the costs. In our behavioral framework, a  
230 switching decision can also be interpreted as a leaving decision. When is the optimal point  
231 to leave the PR side with large reward to maximize the gain?

232           According to MVT, the optimal strategy to maximize energy intake is to leave the  
233 food patch when the current intake rate becomes smaller than the long-term average  
234 intake rate that the predator experiences (Charnov, 1976; Stephens & Krebs, 1955).  
235 Applying this theorem to our decision-making behavior, the optimal solution is to leave  
236 the PR side when the reward/effort ratio becomes smaller than that of the FR. The optimal  
237 switching point can be identified where the slope of the FR intake rate is tangent to the  
238 curve of the PR intake rate (Fig. 5a).

239           We applied MVT to our data. First, the cumulative distribution of the net gain from  
240 the PR was generated and was fitted with a double-exponential function that captured the  
241 sudden change in slope of the PR requirement over time. The cumulative distribution of  
242 the net gain from the FR was fitted linearly, which can be interpreted as the long-term rate  
243 of gain. Then, the tangent point between the two curves was identified. This can be  
244 visualized by shifting the FR line upward (Fig. 5a-b). Finally, the PR requirement was  
245 calculated using this tangent point trial number. The PR requirements estimated by MVT

246 showed the same trend as the other two measures, with requirements increasing with the  
247 relative values of the PR in session parameters. The estimated PR requirements at  
248 indifference points were  $19 \pm 2$ ,  $30 \pm 2$ ,  $26 \pm 3$ , and  $45 \pm 5$  at 2xFR6, 2xFR12, 5xFR6, and  
249 5xFR12, respectively (See Supplementary Table 2 for individual mice). One notable  
250 difference between MVT and the other approaches was that MVT generated the smallest  
251 standard deviations for all four parameters (Table 1).

252 The PR requirements at indifference points estimated by two data-driven  
253 approaches and one based on a theoretical framework are summarized in Table 1.  
254 Comparing the PR requirements from data-driven approaches, the values obtained by  
255 medians were higher than those by sigmoid fit. Considering the estimation with medians  
256 was devised to capture the spread of choices in the later part of a session, it explained  
257 the shift of the PR requirements to the right and the higher values. Interestingly, the values  
258 estimated by MVT were very close to those estimated by sigmoid fit, rejecting the  
259 estimation by medians. In hindsight, it makes sense because mice made decisions based  
260 on the values of the past and current choices, not the future ones that were counted in  
261 the estimation by medians. For instance, when mice performed the task, they did not  
262 know how many times they would revisit the PR in the future. Taken together, MVT  
263 supports the data-driven approach by sigmoid fit for estimating indifference points.

264

### 265 **Different motivational modulation of indifference points**

266 The valuation process is subjective and context-dependent. Motivation is one of  
267 the internal states that can strongly influence the evaluation process. The same volume

268 of water has significantly different values to thirsty vs. sated mice. Assuming the level of  
269 thirst as a proxy of motivational level, we looked at how different levels of motivation  
270 modulated the evaluation process in our decision-making behavior.

271 In the data presented so far, we tried to keep the level of motivation/thirst  
272 consistent by providing a limited amount of water daily. Mice collected some water during  
273 the task and additional water was given after the task if necessary to maintain the health  
274 of mice yet keep them thirsty enough to perform the task consistently. However, we  
275 noticed that in sessions where mice had access to free water the day before, the  
276 performance of mice was different, potentially because they were less thirsty and  
277 therefore less motivated (Fig. 6a). Among the dataset in these less motivated conditions,  
278 the parameter 2xFR12 happened to have enough sessions across mice and allowed us  
279 to compare the effect of two different levels of motivation statistically (e.g. high vs. low  
280 motivation).

281 The differences were detected between low vs. high motivation conditions. The PR  
282 requirement at the indifference points, which represent willingness to work for the large  
283 reward, were significantly lower in sated mice, indicating the value of the PR was  
284 diminished in the low motivational condition (Fig. 6b; sigmoid fit:  $30 \pm 2$  vs.  $24 \pm 5$ ; median  
285 fit:  $40 \pm 2$  vs.  $20 \pm 7$ ; MVT:  $30.1 \pm 1.5$  vs.  $24 \pm 7$ ). Thirsty mice also tended to perform  
286 more trials from the PR with larger reward compared to sated mice (Fig. 6c,  $49 \pm 3$  vs.  $37$   
287  $\pm 8$ ). Unfortunately, animals perform significantly fewer trials in a low motivated state (Fig.  
288 6d,  $340 \pm 60$  vs.  $80 \pm 40$ ) resulting in a less pronounced switching behavior.

289 Although different levels of motivation can shift mice's willingness to work for the  
290 large reward, they should not change the relative valuation of the PR compared to the

291 FR. The relative value of the PR is still higher regardless of the motivational level. For  
292 instance, although a drop of water reward is not as valuable to sated mice as it is to thirsty  
293 mice, a large reward is still more valuable than a small reward regardless of thirst level.  
294 We checked whether this conjecture could be confirmed in our dataset and indeed it was  
295 (Fig. 6e). In the first 80 completed trials, where PR trials are most prevalent, we looked  
296 at the ratio of PR to FR trials. This PR to FR ratio changes consistently between the two  
297 groups as the session progresses (Fig 6e). These results suggest that the relative values  
298 of two choices are independent of the motivational levels. Taken together, our results  
299 indicate that while the level of motivation can influence the overall performance, the  
300 evaluation process of the relative values of given options is independent of the motivation.

## 301 **Discussion**

302 A major goal in this study is to develop a behavioral paradigm that quantitatively assesses  
303 the contribution of costs and benefits to the valuation process in economic choice  
304 behavior. Our task design was inspired by several previous studies, of which the topics  
305 include foraging behavior (Charnov, 1976; Kolling et al., 2012; Stephens & Krebs, 1955),  
306 decision-making (Atalayer & Rowland, 2009; Berridge et al., 2009; Herrnstein, 1961;  
307 Hursh et al., 1988; Kepecs et al., 2008; Padoa-Schioppa & Assad, 2006; Platt & Huettel,  
308 2008; Sugrue et al., 2004; Walton et al., 2006), and motivation (Bailey et al., 2015;  
309 Berridge et al., 2009; Dayan & Balleine, 2002; Salamone et al., 2018). However, a novel  
310 contribution of our study is to provide a quantitative behavior focusing on effort cost and  
311 a theoretical framework based on a normative model. By systematically varying the  
312 amount of reward and effort cost in the two-dimensional parameter space, we were able  
313 to generate an indifference plane that is potentially a more sensitive measure to  
314 distinguish subtle behavioral differences. To the best of our knowledge, this is the first  
315 systematic investigation of the effect of different amounts of effort cost and reward benefit  
316 in mice.

317         Across all mice tested, our results showed that the initial preference for the PR  
318 with large reward shifted to the FR with small reward as the PR got higher. The shift in  
319 preference was quantified by an indifference point where the values of the FR and PR  
320 became equivalent. The relative values of the PR and FR are different in different  
321 parameter pairs (e.g. water reward and effort cost) and indifference points should reflect  
322 these relative values. Surprisingly, our data seemed to show that mice placed more  
323 weight on the FR requirement during valuation. Changes in the PR large reward volume



324 were not significant in our trial distribution analysis (both large reward and incomplete  
325 trials) as well as the median fit indifference point estimations. It is possible that different  
326 volumes of water are not as significant as, for example, two different rewards of water  
327 and sucrose, where a sucrose reward would likely have a much higher reward value than  
328 plain water.

329 Indifference points were calculated with three different methods – 1) fitting data  
330 with a sigmoid function (logistic regression), 2) utilizing median values of choices, and 3)  
331 marginal value theorem, a theory for optimal foraging decisions. The trend of shift of the  
332 side preference was consistent in all three measures. Importantly the values calculated  
333 from MVT were very close to those from the sigmoid fit. This suggests that mice indeed  
334 utilize the optimization principle in their decision-making. It will be important to see how  
335 neuronal activity reflects this switching point and whether the neural activity supports  
336 MVT.

337 In our optimal switching behavior, the pressing requirement is the main cost that  
338 we wanted to implement. However, there are other forms of cost that are widely used in  
339 in the laboratory setup. Probabilistic delivery of reward is one method that represents cost  
340 associated with risk. Discount temporal delay is another one that accounts a temporal  
341 aspect of cost and explains how the relative valuation of reward is placed differently at  
342 different time points. For instance, we tend to assign more value on an immediate reward  
343 than the same amount that can be received in the distant future. Therefore, the time delay  
344 discounts the value of the reward. Although our behavioral task was designed not to  
345 include risk and temporal delay but rather to focus on effort cost, we cannot exclude the  
346 possibility that temporal discount may play a role in the valuation process. However, we

347 reason that the effect size of temporal discount is relatively small because the time scale  
348 for temporal discount effect tends to be much larger than that of one trial used in our  
349 experiments (e.g. hours, days, and months vs. seconds). Considering the time scale of  
350 seconds can be consumed by grooming and exploration, the perception of a few seconds  
351 delay to mice and its discounting factor is unlikely to play a significant role in our task.

352         The value placement is a subjective and relative process. A range of factors can  
353 influence the process and assign different values to the item (Sugrue et al., 2004). For  
354 instance, the same amount of water reward can have a very different value to the same  
355 subject depending on its internal state. However, the large amount of water still has more  
356 value than the small amount. Our data captured this aspect of valuation process. Although  
357 different motivational levels impacted the overall task performance and other behavioral  
358 readouts, the relative value of PR was very similar regardless of the level of thirst.  
359 Although our dataset was limited to one parameter pair (2xFR12) for statistical evaluation,  
360 future research should address whether this finding holds in different parameter pairs.

361         Cost-benefit analysis is a critical component in neuroeconomic decision-making,  
362 yet little is known about neural circuit mechanisms underlying it. Due to the abstract nature  
363 of cost and benefit, and lack of behavioral readouts, the mechanistic investigation at the  
364 neural circuit level has been challenging, especially using an animal model system. Our  
365 contribution is to provide a novel behavioral paradigm with quantitative readouts that are  
366 modulated parametrically. The interpretation of the behavioral results in the context of the  
367 optimization framework (e.g. MVT) conferred additional confirmation of our findings. We  
368 believe that our approach with a quantitative behavior and theoretical framework will  
369 guide the direction of future studies aimed at identifying underlying neuronal circuits.

370 Taking into account the stochastic nature of neuronal activity, it is difficult to expect how  
371 cost information is encoded; however, quantitative behavioral readouts and a theoretical  
372 framework may help us to identify the neuronal signature of the specific information. Since  
373 dysfunction in cost-benefit assessment is a key phenotype in diverse psychopathology  
374 such as addiction, schizophrenia and severe impulsivity, the application of our  
375 quantitative behavior to disease models will be a useful tool to identify behavioral  
376 differences and circuit dysfunction.

## 377 **Methods**

### 378 *Animals*

379 Five female and five male mice of the strain C57BL/6J were used in this study. These  
380 animals were bred on site from mice purchased from Charles River Laboratories. The  
381 mice tested were between the ages of 8 and 13 months. All mice were kept on a 12hr/12hr  
382 light-dark cycle. All experiments were performed according to the guidelines of the  
383 Institutional Animal Care and Use Committee at Brandeis University.

384

### 385 *Behavioral Setup*

386 Experiments were conducted in a rectangular acrylic testing chamber (length, 19.3 cm;  
387 width, 14.0 cm; height, 13.9 cm, SanWorks) with grated flooring. A metal tray was placed  
388 underneath the chamber to collect waste. The chamber contained three nose-pokes with  
389 infrared LED/infrared phototransistor pair (Digikey) to detect responses. A white LED  
390 (Digikey) inside the nose-pokes was used to cue trial availability, lever pressing progress,  
391 and reward availability. Only the center port was used for reward delivery. The two end  
392 ports were used only as lights and were covered with a snugly-fit clear plastic cap.  
393 Plastic levers were custom designed for us by SanWorks for either side of the nose-  
394 pokes. The levers were also equipped with an infrared sensor to capture lever presses.  
395 A food pellet was placed inside the testing chamber at the start of each session to allow  
396 mice to eat in between trials. The testing chamber was situated inside of a custom-built  
397 noise-reducing box (length, 42 cm; width, 39 cm; height, 39 cm). Water reward was  
398 delivered through a solenoid valve inside the nose-pokes (Lee Valve Co). Water was

399 supplied by a 60 mL syringe barrel mounted to the inside wall of the box and connected  
400 to the valve with silicone tubing (1/16" x 3/16", Tygon). The syringe was refilled after every  
401 session to maintain water pressure. Two computer speakers (AmazonBasics) were  
402 placed inside the box on either side of the testing chamber to deliver punishment sounds.  
403 An infrared camera (Logitech) was attached to the top of the inside of the box to allow  
404 observation during sessions. The testing chamber was connected to a Bpod state  
405 machine (SanWorks). Trial events were triggered through Matlab (MathWorks).

406

### 407 *Training*

408 Prior to training, animals were water-restricted for 24 hours. Water was given daily to  
409 maintain 85-90% of their free-drinking body weight. Training occurred in 5 phases and  
410 took about 2-3 weeks. For all stages, mice were able to move to the next phase of training  
411 on the following day if they performed ~80 or more successful trials within an hour. First,  
412 mice were placed into the testing chamber to acclimate and could enter the center nose-  
413 poke (indicated by the center nose-poke being lit) for a small water reward (4 $\mu$ L). The  
414 light turned off when the mouse entered the port and collected the reward. After the  
415 mouse exited the port, there was a one second delay before the next trial began. Second,  
416 mice had to press the right lever once (indicated by the right nose-poke being lit) in order  
417 for the center nose-poke to light up and provide reward. The lever had to be depressed  
418 for at least 100 ms to register as a press. Third, mice repeated the second phase but on  
419 the left side. Fourth, the animal had to press either the left or right lever once in order to  
420 obtain reward. The trials were pseudo-randomly chosen and the correct side to obtain  
421 reward was indicated by the corresponding nose-poke being lit. Finally, mice repeated

422 the fourth phase, but with an increasing number of presses required each day, from 2  
423 presses all the way up to 10 presses. Once mice completed these stages of training, they  
424 were subjected to the optimal switching task and were allowed to familiarize themselves  
425 with the task for 3-5 sessions before data collection began.

426

### 427 *Optimal switching task*

428 Our behavioral task involved combining a progressive ratio (PR) and fixed ratio (FR)  
429 schedule of lever pressing. The PR was associated with a large volume of water (either  
430 6 $\mu$ L or 15 $\mu$ L) and the FR was associated with a small volume of water (3 $\mu$ L). In addition,  
431 the FR could either be 6 presses or 12 presses. Similar to the training phases, levers had  
432 to be depressed for 100 ms to count as a press and there was a one second delay  
433 between trials. The PR and FR sides as well as the parameter pairs were pseudo-  
434 randomly chosen at the start of each session. At the start of a trial, both the left and right  
435 nose-pokes were dimly lit, indicating that the mouse could choose either the left or right  
436 side. Once a mouse chose a side, the corresponding nose-poke would get increasingly  
437 brighter with each press until the required number of presses was met and the center port  
438 lit up to indicate reward availability. Mice were able to freely choose either side; however,  
439 if they decided to switch sides in the middle of a trial before completing the number of  
440 presses on the initially chosen side, a punishment sound of white noise would play and  
441 the trial would end. That trial was then classified as an incomplete trial. Furthermore, if a  
442 mouse began pressing a lever but then stopped for more than 10 seconds to groom itself,  
443 eat, etc., the trial would end and that trial would be considered incomplete. A session  
444 could be anywhere from 1 to 3 hours long. A session ended if a mouse did not press

445 either lever for a period of time longer than 5 minutes. If this did not occur within 3 hours,  
446 the session was ended by the operator. In this way, we can ensure that the mouse is well  
447 sated by the end of the session and that we capture the highest number of trials the  
448 mouse is willing to perform without keeping the animal in the chamber too long. At the  
449 end of each session, the mouse was weighed and additional water was given at the end  
450 of each session if necessary to maintain the animal's weight at 85-90% of their free-  
451 drinking body weight.

452

### 453 *Data analysis*

454 All data analysis was carried out using built-in and custom-built software in Matlab  
455 (Mathworks). The first approach of the identification of indifference points was done with  
456 our binary data with a sigmoid function, the Boltzmann function.

$$457 \quad f(x) = \frac{1}{1 + e^{(x-x_0)/\tau}}$$

458 where  $x_0$  and  $\tau$  are a 50% threshold and a slope. By assigning the value of the PR choice  
459 = 1 and that of the FR = 0 and assuming that the curve started from the PR and ended to  
460 the FR, the fitting curve was generated. An indifference trial number was estimated where  
461 the sigmoid curve crossed the midline and the number of lever presses required at the  
462 trial on the PR side was extracted from the data. This required number of lever presses  
463 provided the indifference point of the session data. In the second approach, the median  
464 values of the choices were utilized. The median trial numbers of the PR and FR were first  
465 calculated and these two medians were connected with a line. An indifference trial

466 number was defined at the intersections where this line connecting medians crosses the  
467 midline. An indifference point was then calculated by identifying the number of presses  
468 required on the PR side at this intersection. The third approach was done with Marginal  
469 Value Theorem. First, we defined the net gain as the ratio between reward obtained and  
470 the number of presses on the PR (e.g. reward/effort) in a trial. The cumulative distribution  
471 of the total net gains of the PR was generated and fitted with a double-exponential  
472 function because it captured the sudden change of slope in the PR data. The cumulative  
473 distribution of the FR was fitted linearly, which can be interpreted as the long-term rate of  
474 gain. Then, the tangent point between two curves was identified and the indifference point  
475 was calculated by identifying the PR requirement at this tangent trial number. Statistical  
476 significance among four parameter pairs was first tested with the two-factor  
477 nonparametric Scheirer-Ray-Hare test and the post-hoc pairwise comparison was done  
478 with Wilcoxon Rank-sum test with Bonferroni correction for 4 comparison pairs. For single  
479 pair comparisons, a nonparametric Wilcoxon Rank-sum test was used. A *P value* cutoff  
480 of 0.05 was used for significance testing.



481 **References**

- 482 Atalayer, D., & Rowland, N. E. (2009). Meal patterns of mice under systematically varying  
483 approach and unit costs for food in a closed economy. *Physiol Behav*, *98*(1-2), 85-  
484 93. doi:10.1016/j.physbeh.2009.04.016
- 485 Bailey, M. R., Jensen, G., Taylor, K., Mezas, C., Williamson, C., Silver, R., . . . Balsam,  
486 P. D. (2015). A novel strategy for dissecting goal-directed action and arousal  
487 components of motivated behavior with a progressive hold-down task. *Behav*  
488 *Neurosci*, *129*(3), 269-280. doi:10.1037/bne0000060
- 489 Bailey, M. R., Simpson, E. H., & Balsam, P. D. (2016). Neural substrates underlying effort,  
490 time, and risk-based decision making in motivated behavior. *Neurobiol Learn Mem*,  
491 *133*, 233-256. doi:10.1016/j.nlm.2016.07.015
- 492 Berridge, K. C., Robinson, T. E., & Aldridge, J. W. (2009). Dissecting components of  
493 reward: 'liking', 'wanting', and learning. *Curr Opin Pharmacol*, *9*(1), 65-73.  
494 doi:10.1016/j.coph.2008.12.014
- 495 Charnov, E. L. (1976). Optimal foraging, the marginal value theorem. *Theor Popul Biol*,  
496 *9*(2), 129-136. Retrieved from <https://www.ncbi.nlm.nih.gov/pubmed/1273796>
- 497 Dayan, P., & Balleine, B. W. (2002). Reward, motivation, and reinforcement learning.  
498 *Neuron*, *36*(2), 285-298. Retrieved from  
499 <https://www.ncbi.nlm.nih.gov/pubmed/12383782>
- 500 Herrnstein, R. J. (1961). Relative and absolute strength of response as a function of  
501 frequency of reinforcement. *J Exp Anal Behav*, *4*, 267-272.  
502 doi:10.1901/jeab.1961.4-267

- 503 Hodos, W. (1961). Progressive ratio as a measure of reward strength. *Science*,  
504 134(3483), 943-944. Retrieved from  
505 <https://www.ncbi.nlm.nih.gov/pubmed/13714876>
- 506 Hursh, S. R., Raslear, T. G., Shurtleff, D., Bauman, R., & Simmons, L. (1988). A cost-  
507 benefit analysis of demand for food. *J Exp Anal Behav*, 50(3), 419-440.  
508 doi:10.1901/jeab.1988.50-419
- 509 Kepecs, A., Uchida, N., Zariwala, H. A., & Mainen, Z. F. (2008). Neural correlates,  
510 computation and behavioural impact of decision confidence. *Nature*, 455(7210),  
511 227-231. doi:10.1038/nature07200
- 512 Kolling, N., Behrens, T. E., Mars, R. B., & Rushworth, M. F. (2012). Neural mechanisms  
513 of foraging. *Science*, 336(6077), 95-98. doi:10.1126/science.1216930
- 514 Levy, D. J., & Glimcher, P. W. (2012). The root of all value: a neural common currency  
515 for choice. *Curr Opin Neurobiol*, 22(6), 1027-1038.  
516 doi:10.1016/j.conb.2012.06.001
- 517 Mar, A. C., Walker, A. L., Theobald, D. E., Eagle, D. M., & Robbins, T. W. (2011).  
518 Dissociable effects of lesions to orbitofrontal cortex subregions on impulsive choice  
519 in the rat. *J Neurosci*, 31(17), 6398-6404. doi:10.1523/JNEUROSCI.6620-10.2011
- 520 Montague, P. R., & Berns, G. S. (2002). Neural economics and the biological substrates  
521 of valuation. *Neuron*, 36(2), 265-284. Retrieved from  
522 <https://www.ncbi.nlm.nih.gov/pubmed/12383781>
- 523 Padoa-Schioppa, C. (2009). Range-adapting representation of economic value in the  
524 orbitofrontal cortex. *J Neurosci*, 29(44), 14004-14014.  
525 doi:10.1523/JNEUROSCI.3751-09.2009

- 526 Padoa-Schioppa, C., & Assad, J. A. (2006). Neurons in the orbitofrontal cortex encode  
527 economic value. *Nature*, *441*(7090), 223-226. doi:10.1038/nature04676
- 528 Platt, M. L., & Huettel, S. A. (2008). Risky business: the neuroeconomics of decision  
529 making under uncertainty. *Nat Neurosci*, *11*(4), 398-403. doi:10.1038/nn2062
- 530 Rudebeck, P. H., Walton, M. E., Smyth, A. N., Bannerman, D. M., & Rushworth, M. F.  
531 (2006). Separate neural pathways process different decision costs. *Nat Neurosci*,  
532 *9*(9), 1161-1168. doi:10.1038/nn1756
- 533 Salamone, J. D., Correa, M., Yang, J. H., Rotolo, R., & Presby, R. (2018). Dopamine,  
534 Effort-Based Choice, and Behavioral Economics: Basic and Translational  
535 Research. *Front Behav Neurosci*, *12*, 52. doi:10.3389/fnbeh.2018.00052
- 536 Salamone, J. D., Steinpreis, R. E., McCullough, L. D., Smith, P., Grebel, D., & Mahan, K.  
537 (1991). Haloperidol and nucleus accumbens dopamine depletion suppress lever  
538 pressing for food but increase free food consumption in a novel food choice  
539 procedure. *Psychopharmacology (Berl)*, *104*(4), 515-521. Retrieved from  
540 <https://www.ncbi.nlm.nih.gov/pubmed/1780422>
- 541 Schultz, W., Dayan, P., & Montague, P. R. (1997). A neural substrate of prediction and  
542 reward. *Science*, *275*(5306), 1593-1599. Retrieved from  
543 <https://www.ncbi.nlm.nih.gov/pubmed/9054347>
- 544 Stephens, D. W., & Krebs, J. R. (1955). *Foraging theory. Monographs in behavior and*  
545 *ecology*: Princeton Academic Press.
- 546 Sugrue, L. P., Corrado, G. S., & Newsome, W. T. (2004). Matching behavior and the  
547 representation of value in the parietal cortex. *Science*, *304*(5678), 1782-1787.  
548 doi:10.1126/science.1094765

- 549 Sutton, R. S. B., A. G. (1998). *Reinforcement learning: an introduction*: A Bradford Book,  
550 The MIT Press.
- 551 Sweis, B. M., Abram, S. V., Schmidt, B. J., Seeland, K. D., MacDonald, A. W., 3rd,  
552 Thomas, M. J., & Redish, A. D. (2018). Sensitivity to "sunk costs" in mice, rats, and  
553 humans. *Science*, *361*(6398), 178-181. doi:10.1126/science.aar8644
- 554 Walton, M. E., Kennerley, S. W., Bannerman, D. M., Phillips, P. E., & Rushworth, M. F.  
555 (2006). Weighing up the benefits of work: behavioral and neural analyses of effort-  
556 related decision making. *Neural Netw*, *19*(8), 1302-1314.  
557 doi:10.1016/j.neunet.2006.03.005

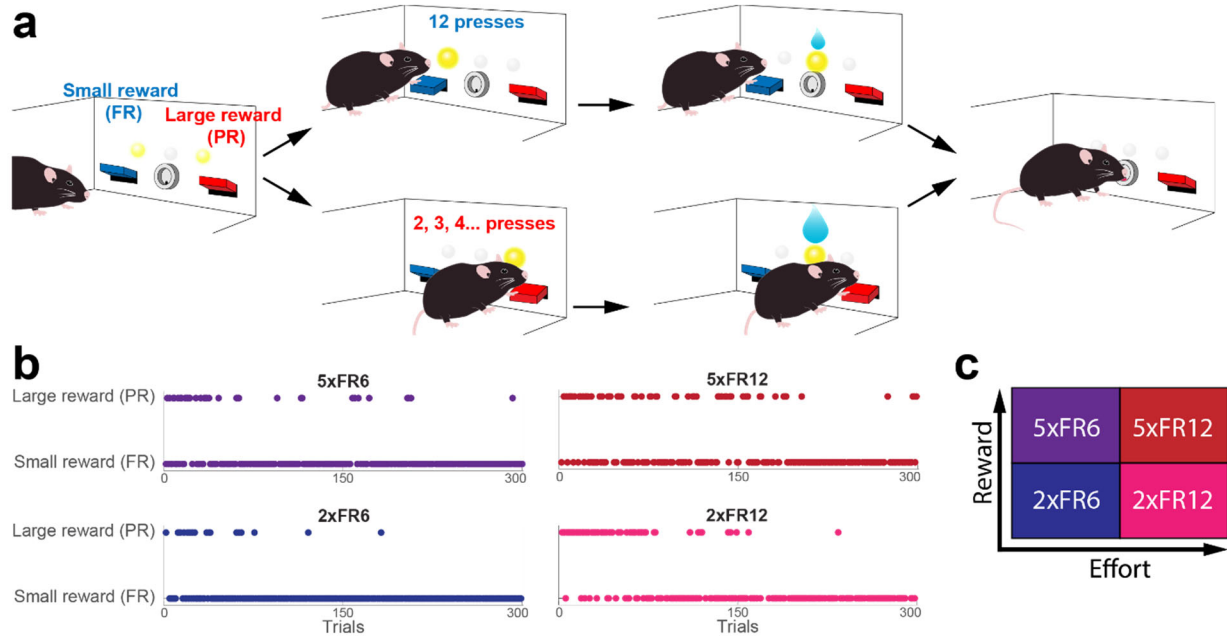

**Figure 1. Optimal Switching Behavior Task.** **a**, Schematic of task design. **b**, Example sessions for each parameter pair. Each point is a single trial within the session. Only the first 300 trials of each session are shown. All sessions are from the same animal. **c**, Grid showing increasing reward and effort for each type of parameter pair.

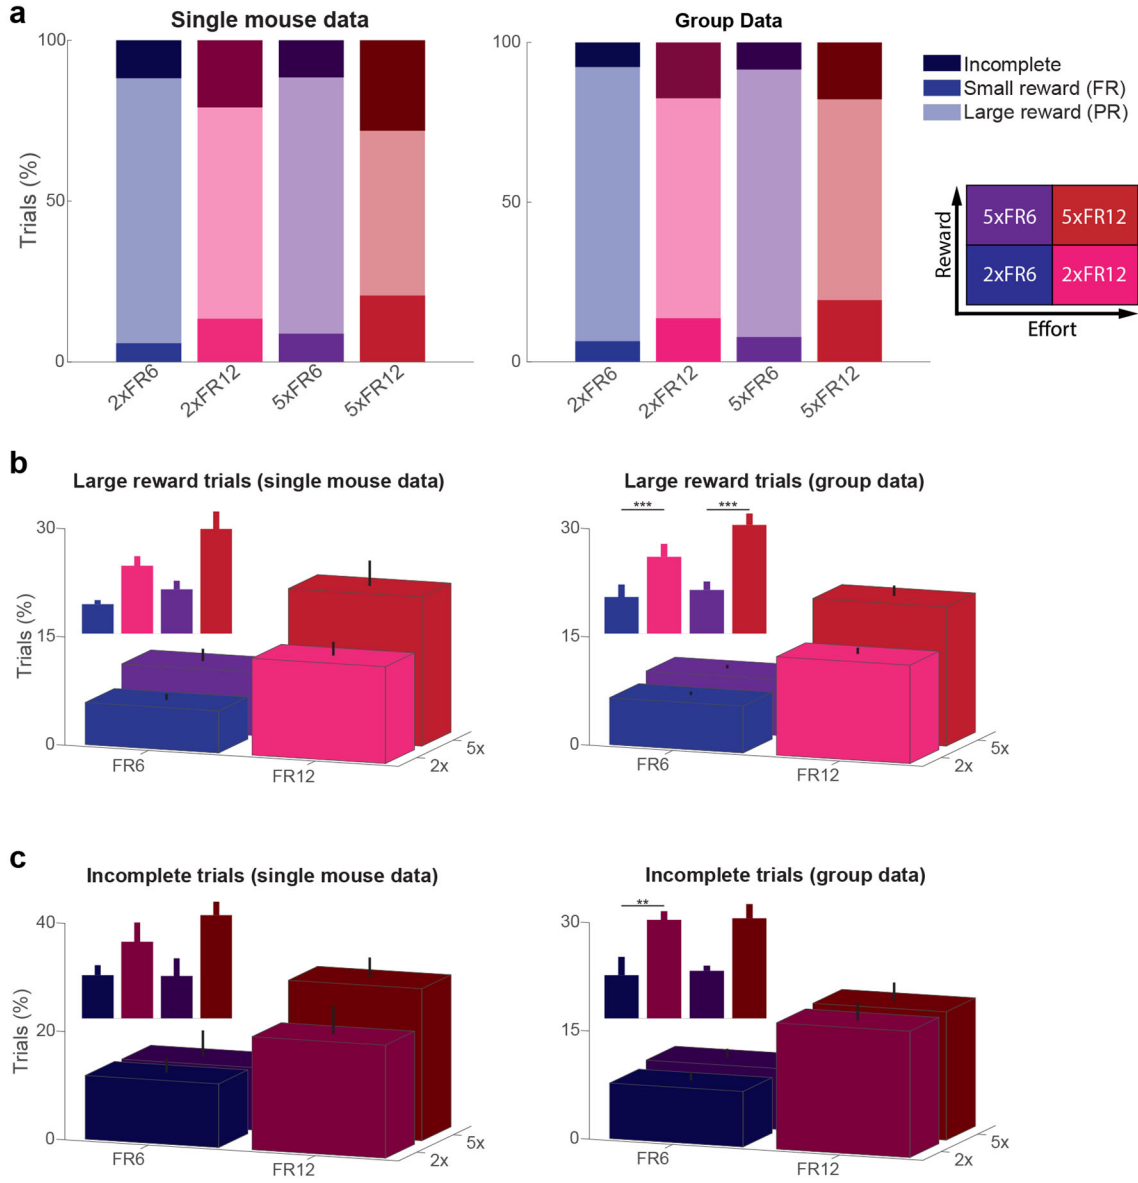

**Figure 2. Trial type ratios reflect evaluation of changing cost and benefit between session parameters.** **a**, Stacked bar graph showing trial distributions for each session (left, n = 4 sessions; right, n = 10 mice). **b**, Percent of trials where large reward (PR) was collected (left, n = 4 sessions; right, n = 10 mice). Error bars reflect standard error of the mean. A two-way Scheirer-ray-Hare test indicated a significant effect in the FR requirement ( $H_1 = 28.98$ ,  $p = 7 \times 10^{-8}$ ). Insert shows the same data with significant pairs notated (post hoc Wilcoxon Rank-sum test with Bonferroni correction,  $***P < 0.001$ ). **c**, Percent of trials where reward collection was failed (left, n = 4 sessions; right, n = 10 mice). Error bars reflect standard error of the mean. A two-way Scheirer-Ray-Hare test indicated a significant effect in the FR requirement ( $H_1 = 16.46$ ,  $p = 5 \times 10^{-5}$ ). Insert shows the same data with significant pairs notated (post hoc Wilcoxon Rank-sum test with Bonferroni correction,  $**P < 0.01$ ).

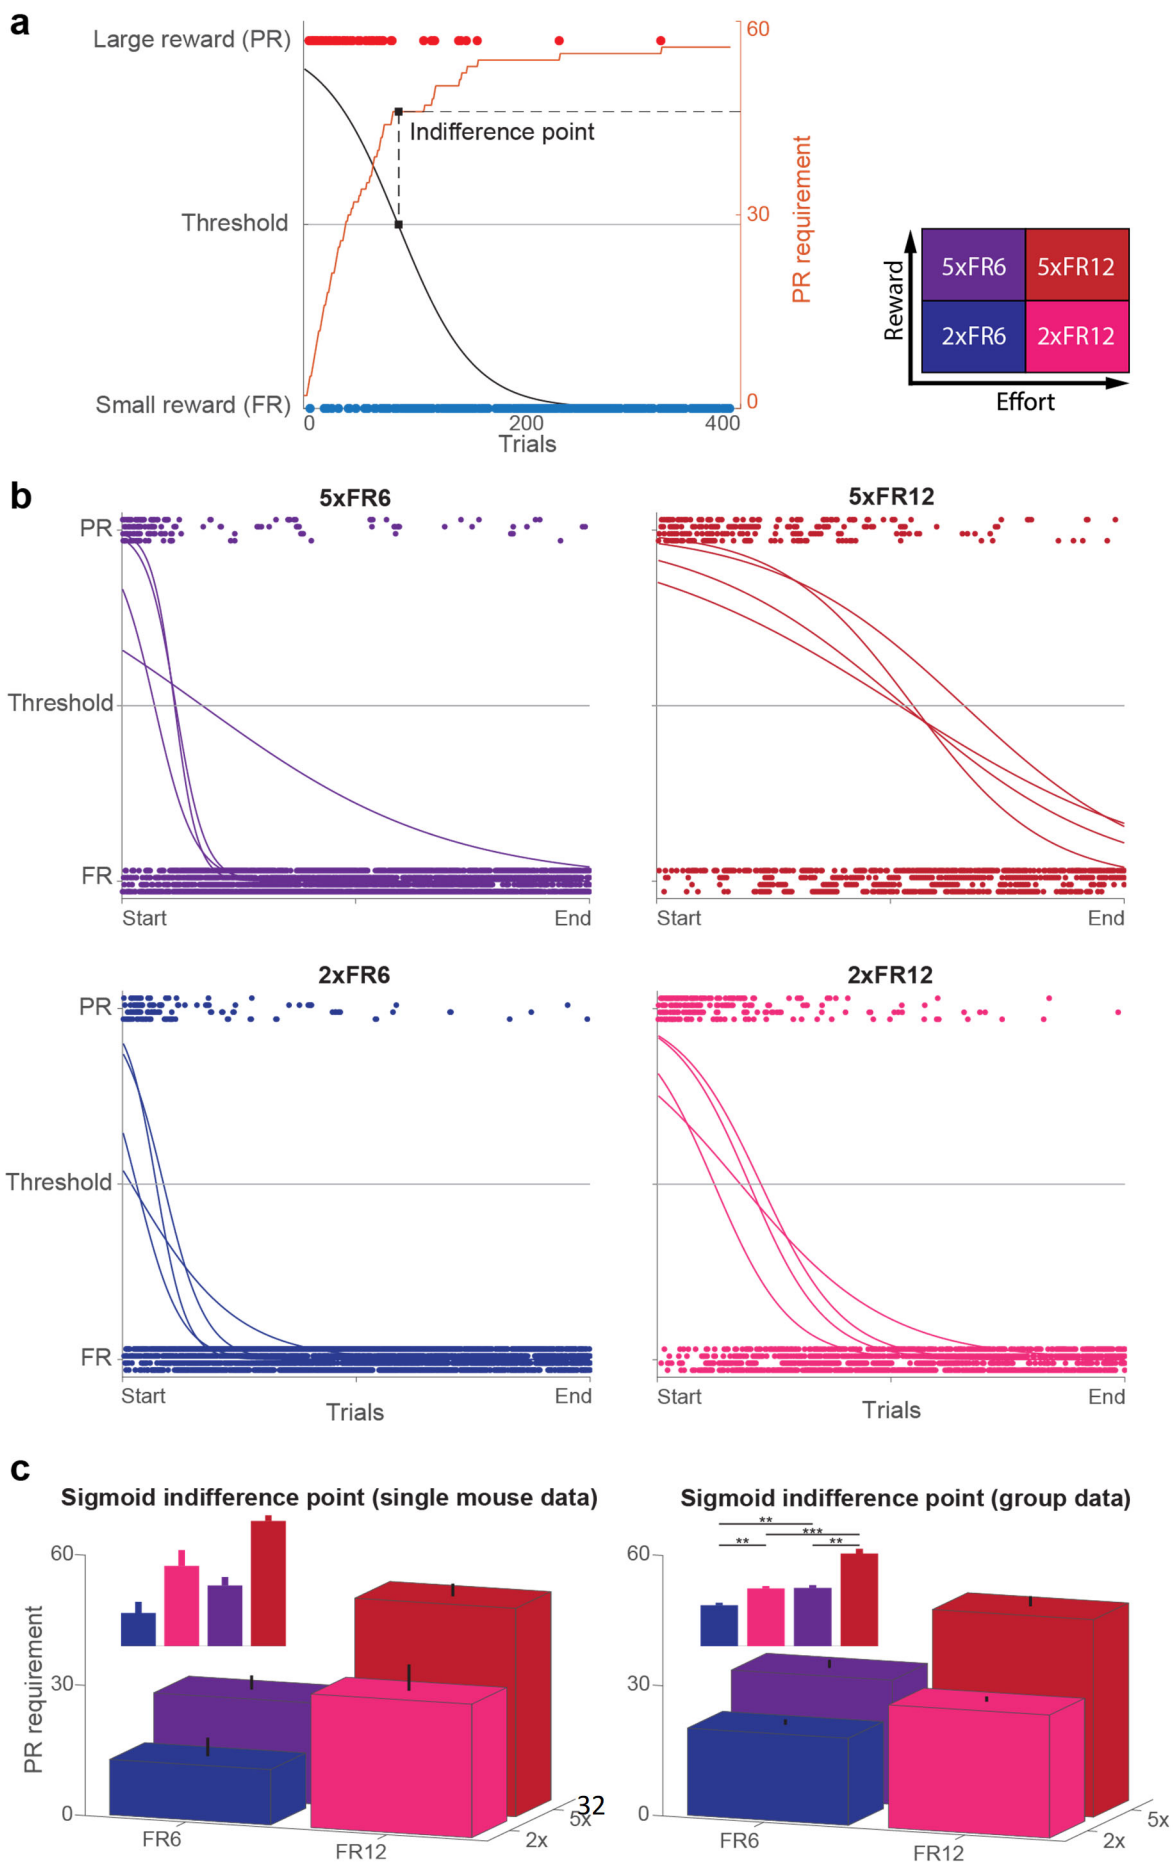



**Figure 3. Estimating indifference points through a sigmoid curve shows variation in switching behavior between parameter conditions.** **a**, Example session showing how the indifference point is estimated. Black curve is the sigmoid fit and orange curve is the cumulative PR. First, the data is fitted to a sigmoid curve. Then, where the curve crosses the threshold, a trial number is identified (black squares). Finally, the indifference point is determined by finding the number of presses required for the PR at this trial (dashed lines). **b**, Sigmoid curves for all 16 sessions of one mouse, sorted by session parameters. Trials are plotted as individual points normalized to the total number of trials in the session and each row of points is a different session. For sessions with higher reward or effort, the threshold intersection shifts farther to the right. **c**, Indifference points for a single mouse (left,  $n = 4$  sessions) and the entire population (right,  $n = 10$  mice). Error bars reflect standard error of the mean. A two-way Scheirer-Ray-Hare test indicated a significant effect in the FR requirement ( $H_1 = 14.05$ ,  $p = 0.0002$ ) and the PR reward volume ( $H_1 = 15.72$ ,  $p = 7 \times 10^{-5}$ ). Insert shows the same data with significant pairs notated (post hoc Wilcoxon Rank-sum test with Bonferroni correction,  $**p < 0.01$ ,  $***p < 0.001$ ).

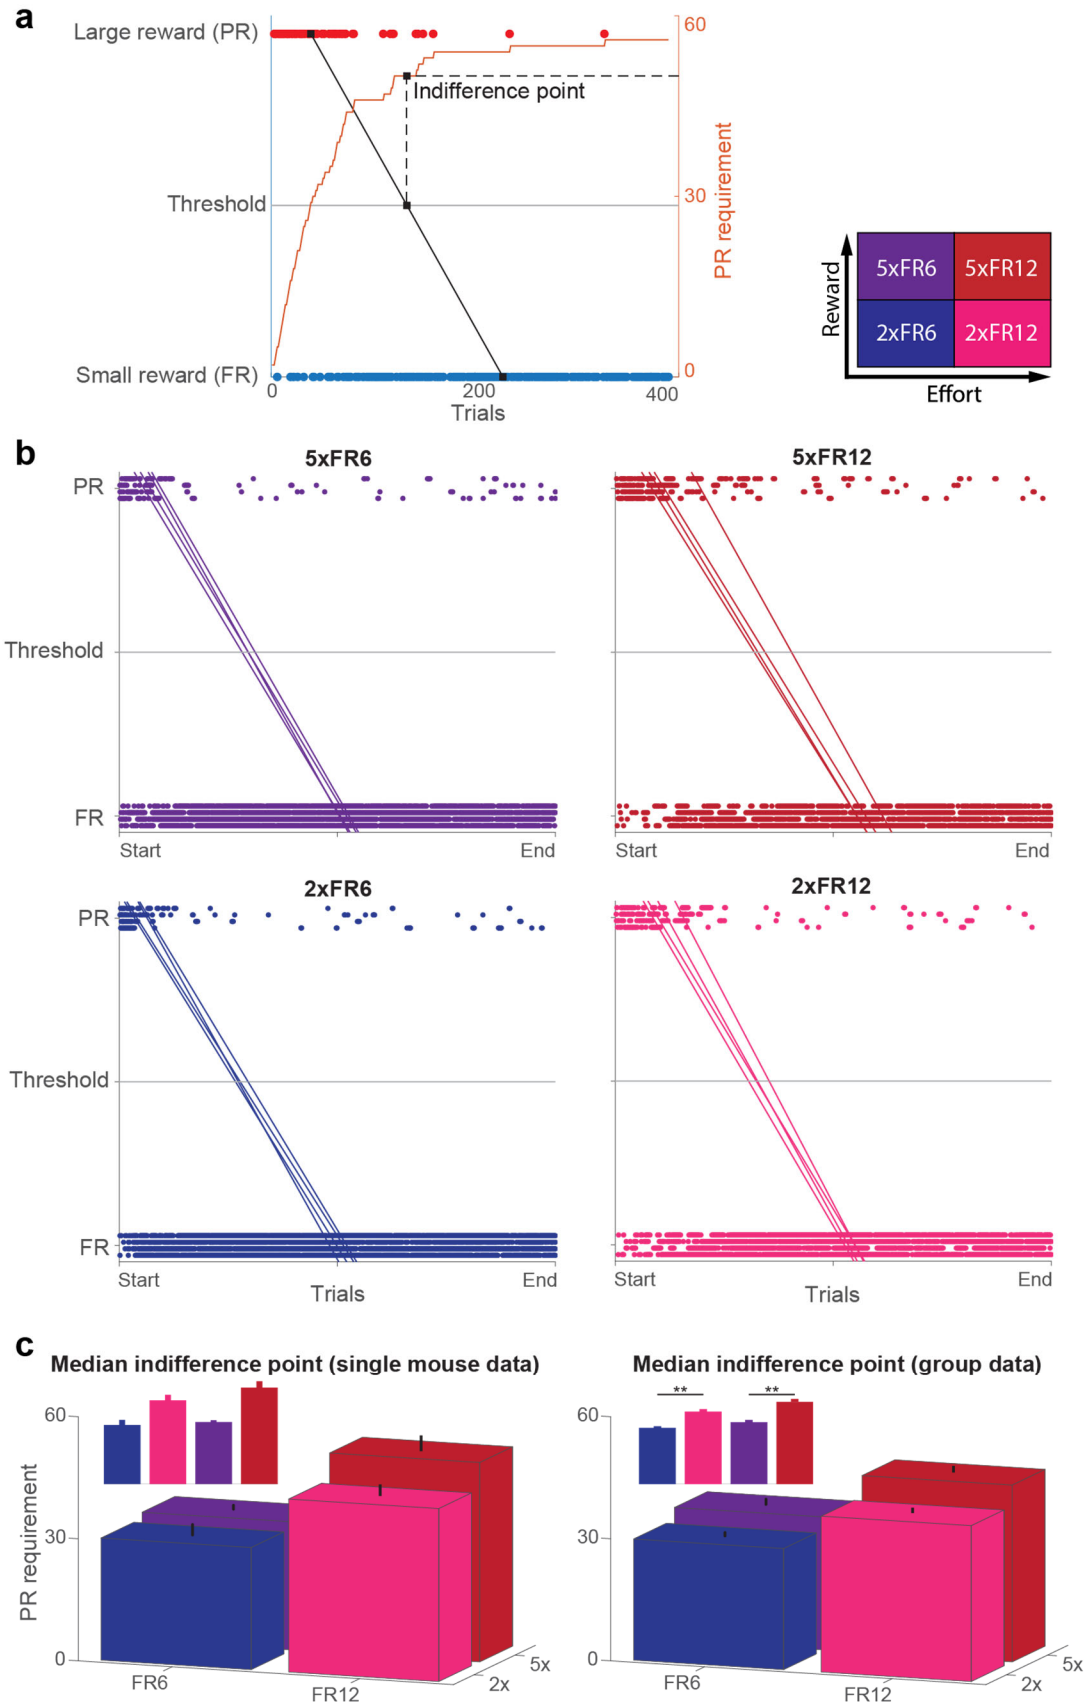

**Figure 4. Calculating indifference points using median trial values displays variation in switching behavior between parameter conditions.** **a**, Example session showing how the indifference point is estimated. Black line is the linear fit and orange curve is the cumulative PR. First, the median trial numbers for PR and FR trials are calculated and connected by a line. Then, where the line crosses the threshold, a trial number is identified (black squares). Finally, the indifference point is determined by finding the number of presses required for the PR at this trial (dashed lines). **b**, Median lines for all 16 sessions of one mouse, sorted by session parameters. Trials are plotted as individual points normalized to the total number of trials in the session and each row of points is a different session. **c**, Indifference points for a single mouse (left,  $n = 4$  sessions) and the entire population (right,  $n = 10$  mice). Error bars reflect standard error of the mean. A two-way Scheirer-Ray-Hare test indicated a significant effect in the FR requirement ( $H_1 = 22.70$ ,  $p = 2 \times 10^{-6}$ ). Insert shows the same data with significant pairs notated (post hoc Wilcoxon Rank-sum test with Bonferroni correction,  $**p < 0.01$ ).

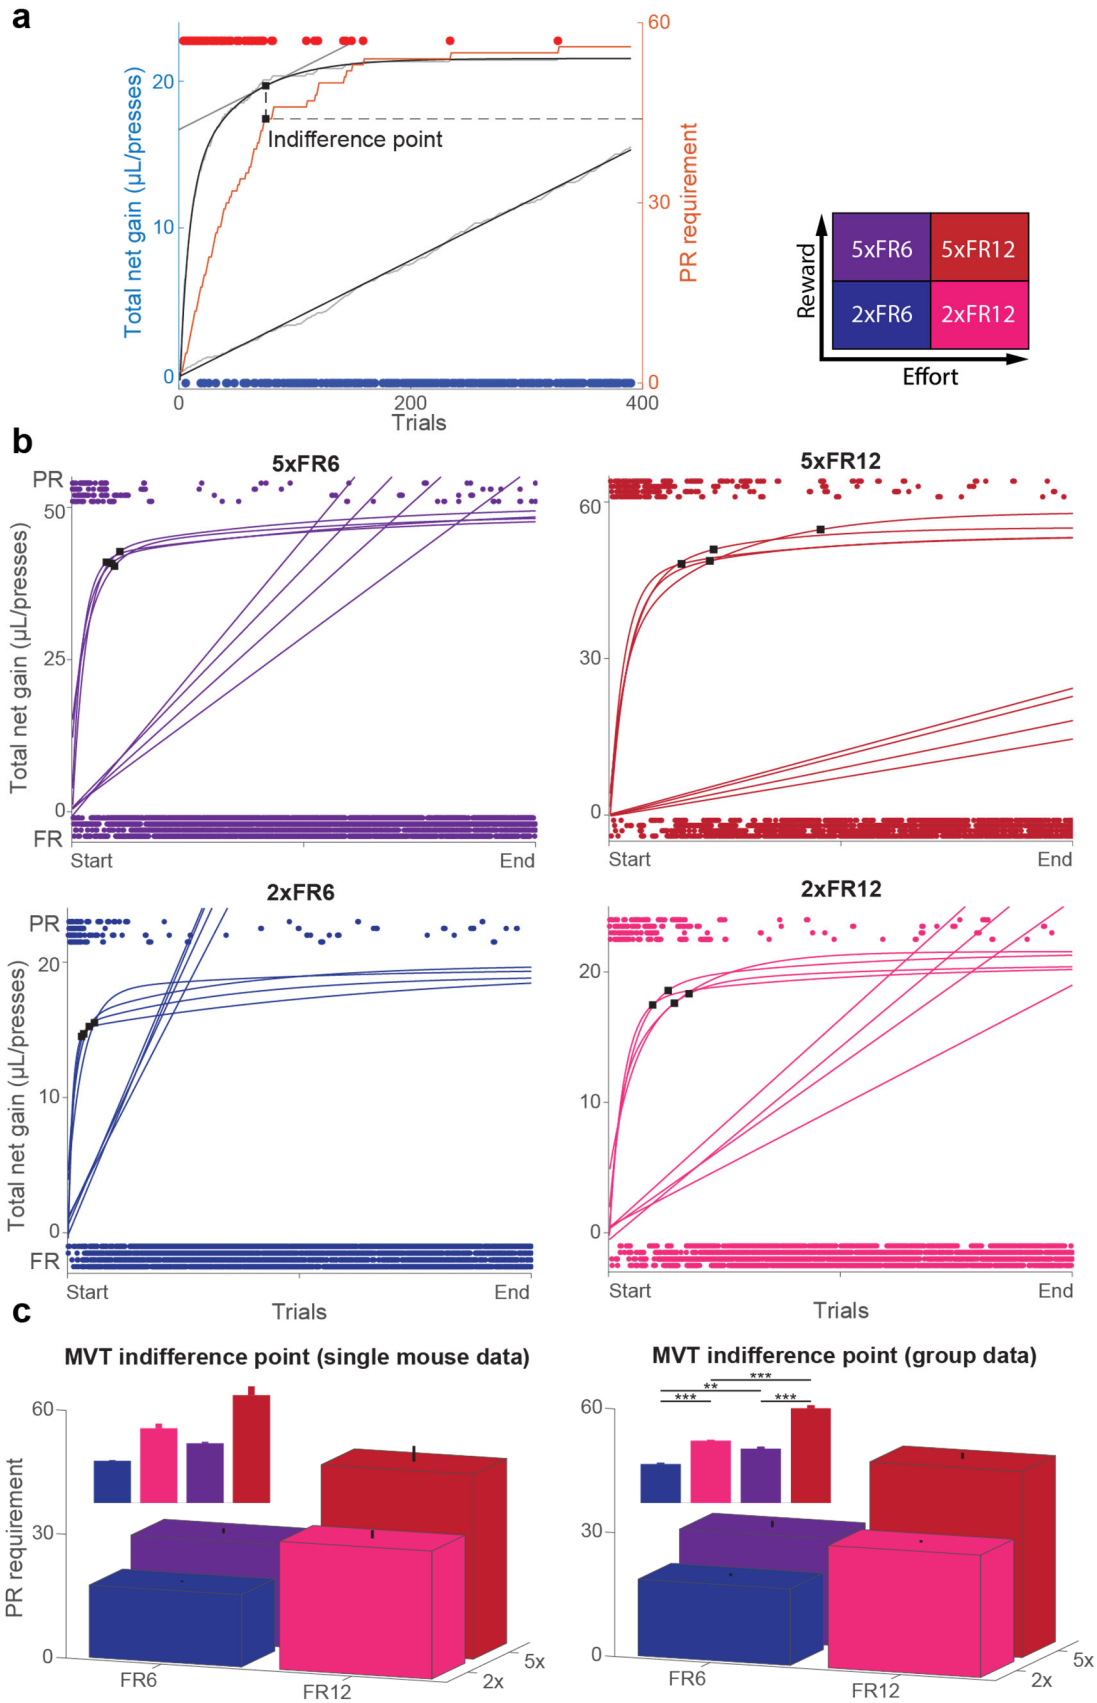

**Figure 5. Using a normative model to estimate indifference points.** **a**, Example session showing how the indifference point is estimated. Black lines are the MVT curves and orange line is the cumulative PR. First, the data for PR and FR are fit to a double-exponential and linear function, respectively (methods). A tangent point is calculated where the slope of the FR line (grey line) is tangent to the PR curve (black square). Finally, the indifference point is determined by finding the number of presses required for the PR at the trial where the tangent point occurred (dashed lines). **b**, MVT model curves for all 16 sessions of one mouse, sorted by session parameters. Tangent points are indicated by black squares. Trials are plotted as individual points normalized to the total number of trials in the session and each row of points is a different session. For sessions with higher reward or effort, the tangent points shift farther to the right. **c**, Indifference points for a single mouse (left,  $n = 4$  sessions) and the entire population (right,  $n = 10$  mice). Error bars reflect standard error of the mean. A two-way Scheirer-Ray-Hare test indicated a significant effect in the FR requirement ( $H_1 = 25.20$ ,  $p = 5 \times 10^{-7}$ ) and the PR reward volume ( $H_1 = 9.35$ ,  $p = 0.002$ ). Insert shows the same data with significant pairs notated (post hoc Wilcoxon Rank-sum test with Bonferroni correction,  $**p < 0.01$ ,  $***p < 0.001$ ).

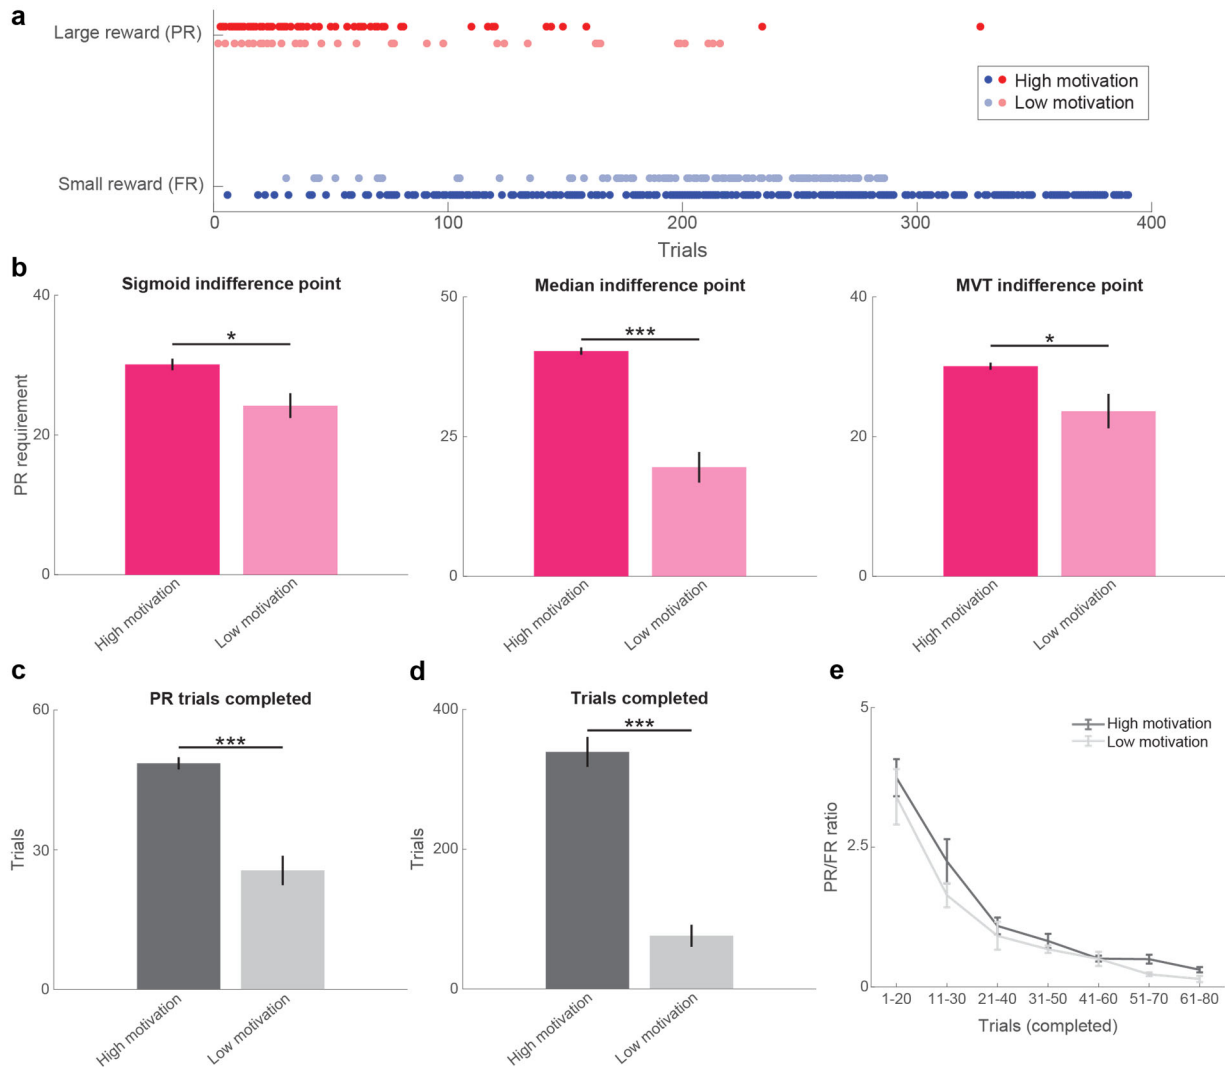

**Figure 6. Motivation level effects choices in optimal switching task.** **a**, Example sessions of a high and low motivational state from the same mouse. **b**, Mice switch from PR to FR earlier in a low motivational state (Wilcoxon Rank-sum test, \* $p < 0.05$ , \*\*\* $p < 0.001$ ,  $n = 7$  mice). Error bars reflect standard error of the mean. **c**, Mice complete more PR trials when in a high motivational state (Wilcoxon Rank-sum test, \*\*\* $p < 0.001$ ,  $n = 7$  mice). Error bars reflect standard error of the mean. **d**, Mice complete more trials when in a high motivational state (Wilcoxon Rank-sum test, \*\*\* $p < 0.001$ ,  $n = 7$  mice). Error bars reflect standard error of the mean. **e**, Comparison of high and low motivation PR/FR ratios over time ( $n = 7$  mice). Error bars reflect standard error of the mean.

|                    | <b>2xFR6</b> | <b>2xFR12</b> | <b>5xFR6</b> | <b>5xFR12</b> |
|--------------------|--------------|---------------|--------------|---------------|
| <b>Sigmoid Fit</b> | 20 ± 4       | 28 ± 4        | 29 ± 4       | 45 ± 7        |
| <b>Medians</b>     | 30 ± 3       | 38 ± 4        | 33 ± 4       | 44 ± 5        |
| <b>MVT</b>         | 19 ± 2       | 30 ± 2        | 26 ± 3       | 45 ± 5        |

**Table 1. Summary of indifference points.** Each average indifference point and standard deviation (n = 10 mice) are compiled for easy comparison of each parameter pair and indifference point estimation method.
